# Supplementary material for: Арендная плата за земли сельскохозяйственного назначения в муниципальных образованиях (на примере муниципальных образований Ивановской области)
Source: Royal Society of Chemistry journal article supplement (doi:10.1039/d1tb00231g), 2012-01-01
Supplement: d1tb00231g1.pdf [file d1tb00231g1.pdf]

## **Electronic Supplementary Information**

For

### **Application of Femtosecond Laser Microfabrication in the Preparation of Advanced Bioactive Titanium Surfaces**

*Fengxiong Luo, Ling Wang, Zhanwen Xiao, Xiangdong Zhu, Yujiang Fan,  
Kefeng Wang\*, and Xingdong Zhang*

National Engineering Research Center for Biomaterials, Sichuan University, Chengdu  
610064, China

\*Corresponding Author: [fencal@163.com](mailto:fencal@163.com) (KF. Wang)

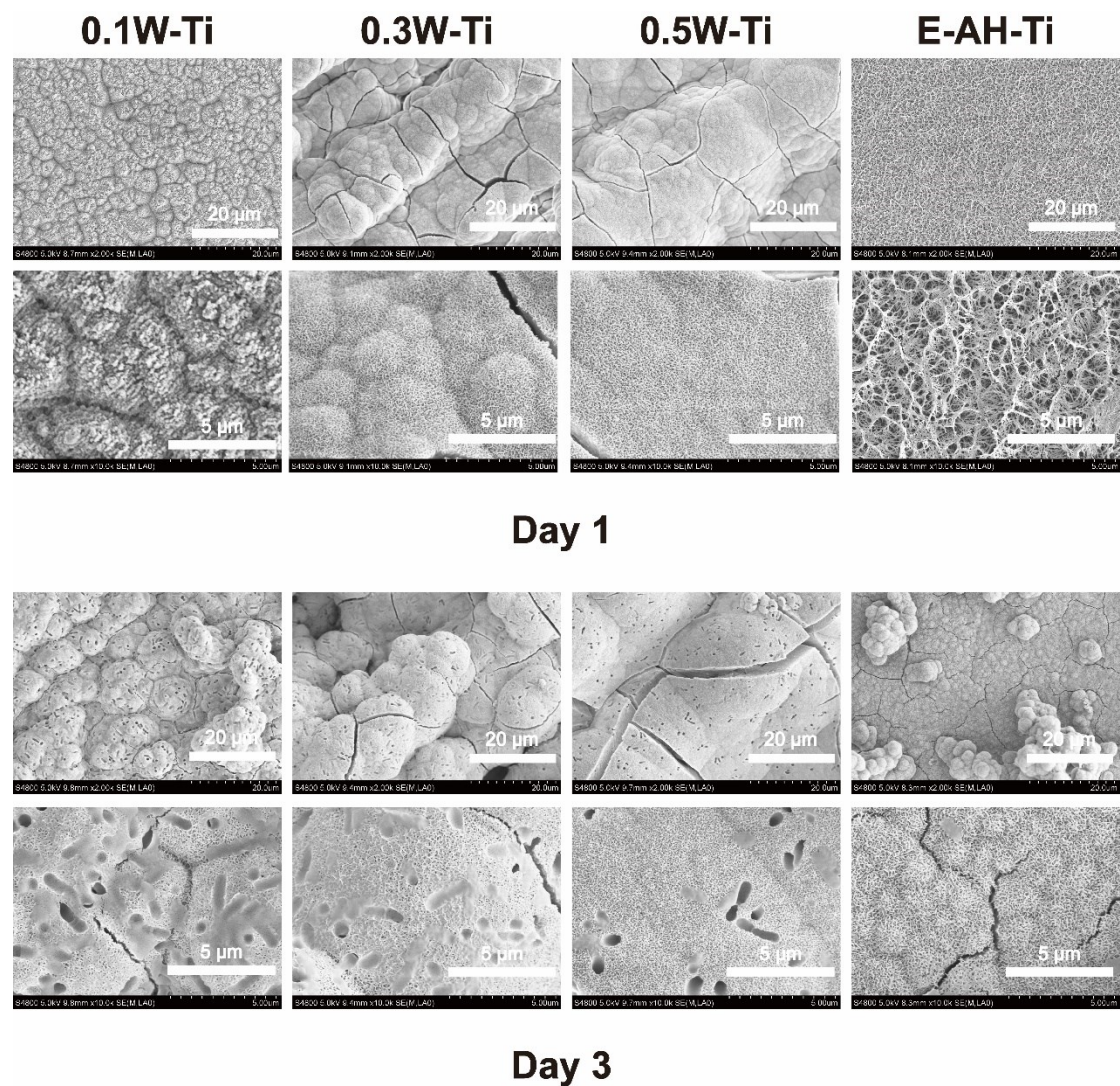

Figure S1. SEM micrographs with higher magnification of 0.1W-Ti, 0.3W-Ti, 0.5W-Ti and E-AH-Ti after soaking in SBF for 1 day and 3 days.
